# Supplementary material for: Insights into the degradation of emerging organic pollutants by peroxydisulfate activated with Co3O4@NiO: role of each component and catalytic mechanism
Source: Royal Society of Chemistry journal article supplement (doi:10.1039/d2nj02044k), 2022-01-01
Supplement: d2nj02044k1.pdf [file d2nj02044k1.pdf]

## Supplementary Material

### **The insight into the degradation of emerging organic pollutants by peroxydisulfate activated with $\text{Co}_3\text{O}_4@\text{NiO}$ : Role of each component and catalytic mechanism**

Yanqing Cong, Wanxing Wang, Xiang Chen, Yi Zhang, Shi-Wen Lv\*

School of Environmental Science and Engineering, Zhejiang Gongshang University,  
Hangzhou 310018, China

---

\*Corresponding author.

Mail to: No.18 Xuezheng Road, Hangzhou, 310018, China.

Email: [lvshiwen@zjgsu.edu.cn](mailto:lvshiwen@zjgsu.edu.cn) (Shi-Wen Lv)

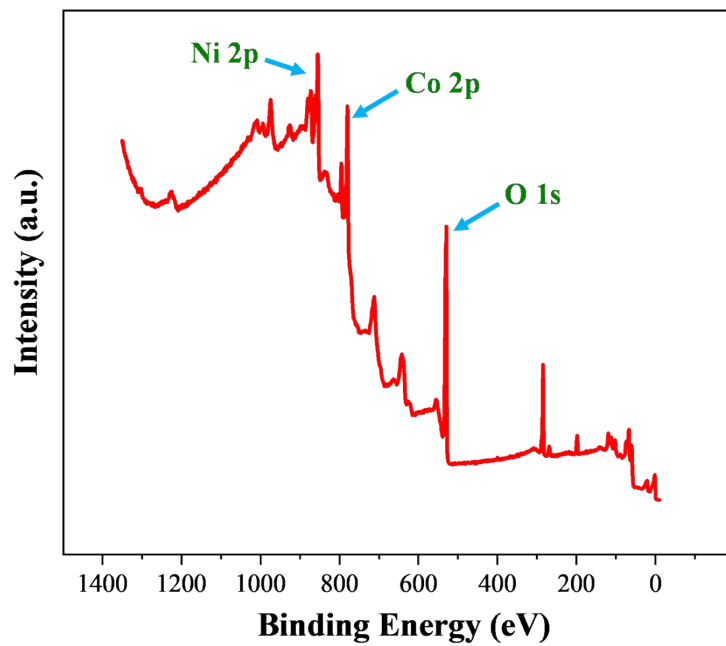

**Fig. S1.** XPS survey spectrum of Co<sub>3</sub>O<sub>4</sub>@NiO-2.

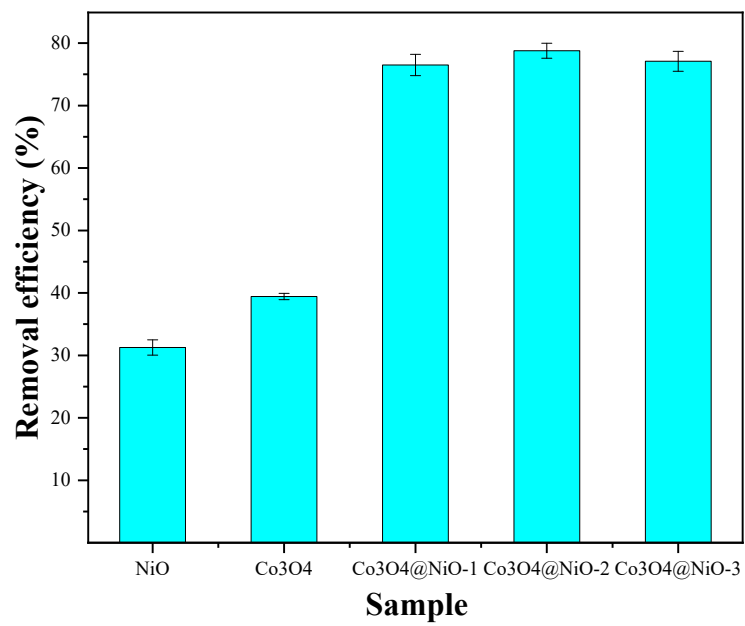

**Fig. S2.** The removal efficiencies of TC by different catalysts in the presence of PS.

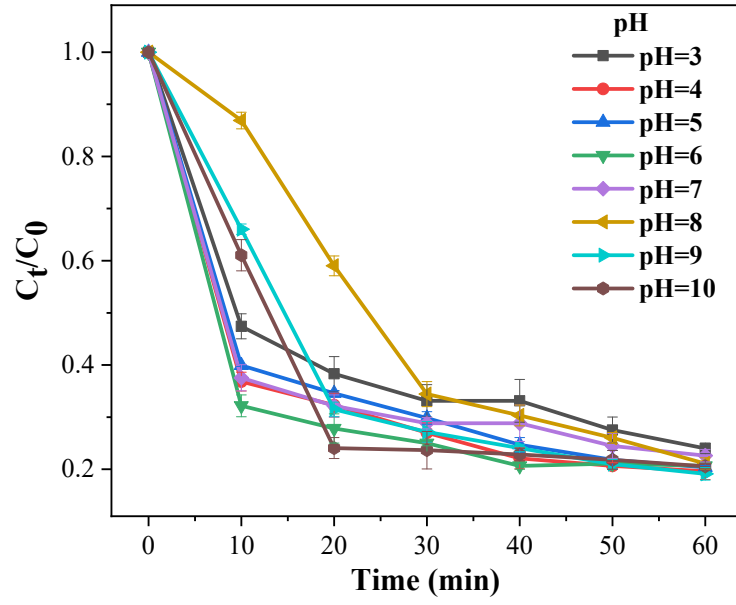

**Fig. S3.** Effects of pH values on TC degradation by the  $\text{Co}_3\text{O}_4@\text{NiO-2/PS}$  oxidation system.

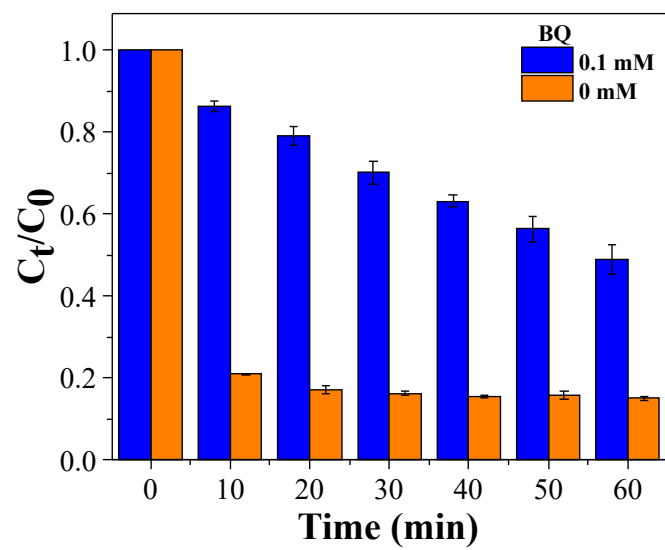

**Fig. S4.** Effect of BQ on TC degradation by the  $\text{Co}_3\text{O}_4@\text{NiO}-2/\text{PS}$  oxidation system.
